# Supplementary material
Source: MDPI journal article supplement (https://www.mdpi.com/2075-4701/7/4/142)
Supplement: s1 [file s1]

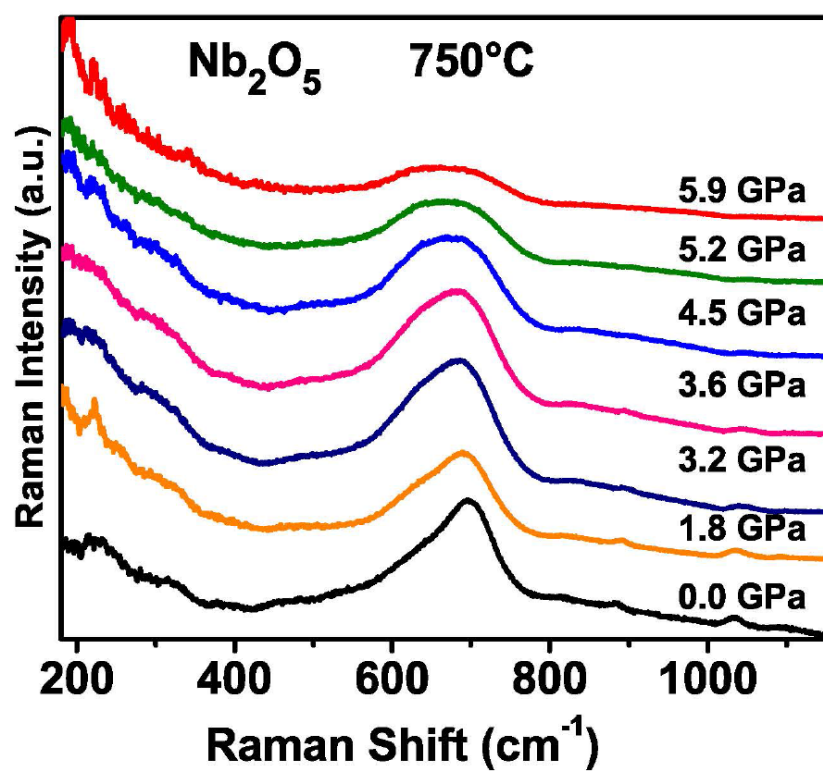

**Figure S1.** Raman spectra of  $\text{Nb}_2\text{O}_5$  obtained by the sol-gel method at  $750^\circ\text{C}$  ( $\text{NH}_4\text{OH}$ ) as function of the hydrostatic pressure, recorded at room temperature.
